# Supplementary material
Source: HighWire-hosted journal article supplement (https://bmjopen.bmj.com/content/7/9/e016321)
Supplement: inline-supplementary-material-1 [file inline-supplementary-material-1.pdf]

**Supplementary table S1. PICOS framework.**

**PICOS framework**

---

|                                    |                                                                                                                                                                                                                                                                                                                                                                                                                                                                                                                                                                                                                                 |
|------------------------------------|---------------------------------------------------------------------------------------------------------------------------------------------------------------------------------------------------------------------------------------------------------------------------------------------------------------------------------------------------------------------------------------------------------------------------------------------------------------------------------------------------------------------------------------------------------------------------------------------------------------------------------|
| <b>Population</b>                  | Patients with severe aortic stenosis that needs to be treated. Baseline patient characteristics can be found in table 1.                                                                                                                                                                                                                                                                                                                                                                                                                                                                                                        |
| <b>Intervention and Comparison</b> | Intervention of interest is a transcatheter aortic valve implantation (TAVI) under local anesthesia (LAS) with optional mild to moderate sedation compared with general anesthesia (GA).                                                                                                                                                                                                                                                                                                                                                                                                                                        |
| <b>Outcome</b>                     | Outcome parameters to be studied are 30-day mortality, length of hospital stay and pneumonia as primary outcome parameters as well as in-hospital mortality, conversion from LAS to GA, conversion to open heart surgery, major vascular complications, minor vascular complications, major and life-threatening bleeding, minor bleeding, intraprocedural catecholamine treatment, postprocedural catecholamine treatment, red blood cell transfusion, length of ICU stay, new pacemaker implantation, moderate/severe aortic regurgitation, acute kidney injury, myocardial infarction, sepsis as further outcome parameters. |
| <b>Question at issue</b>           | Does the use of local anesthesia with optional mild to moderate sedation in TAVI have a favorable effect on complications and outcome in patients with severe aortic stenosis compared with TAVI under general anesthesia?                                                                                                                                                                                                                                                                                                                                                                                                      |
| <b>Study design</b>                | Randomized controlled trials (RCTs) and observational studies, both prospective and retrospective.                                                                                                                                                                                                                                                                                                                                                                                                                                                                                                                              |
