# Supplementary material
Source: HighWire-hosted journal article supplement (https://bmjopen.bmj.com/content/7/9/e016321)

**Supplementary figure S4. Funnel plots.**

- A) outcome: 30-day mortality
- B) outcome: new pacemaker implantation
- C) outcome: acute kidney injury
- D) outcome: stroke
- E) outcome: major vascular complications

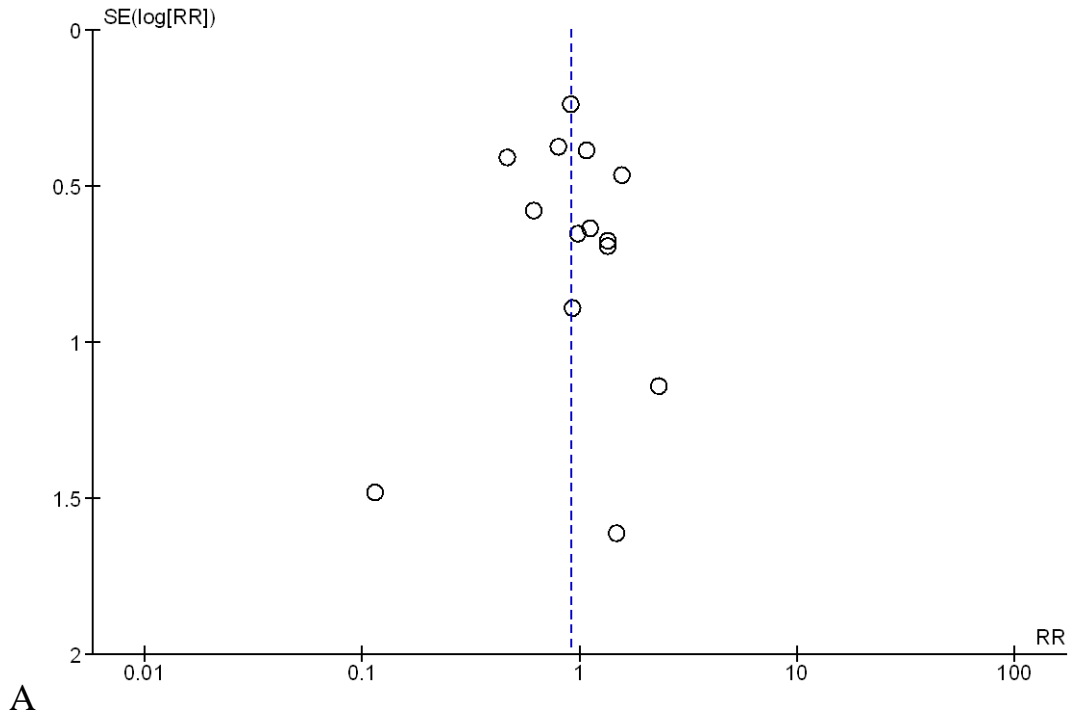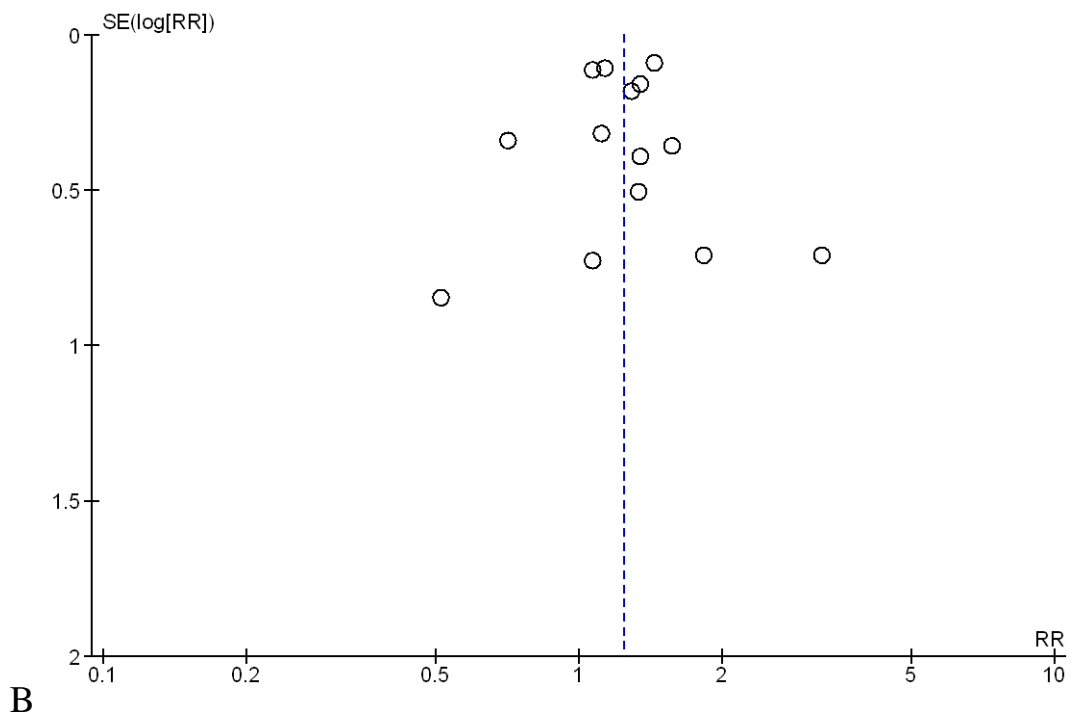

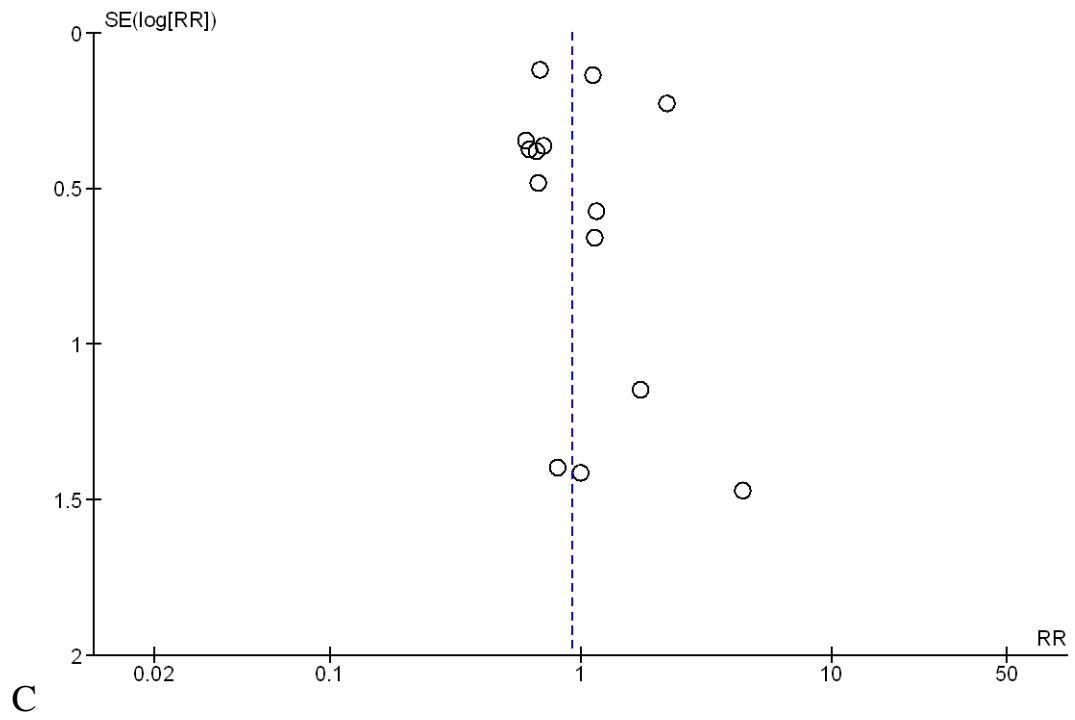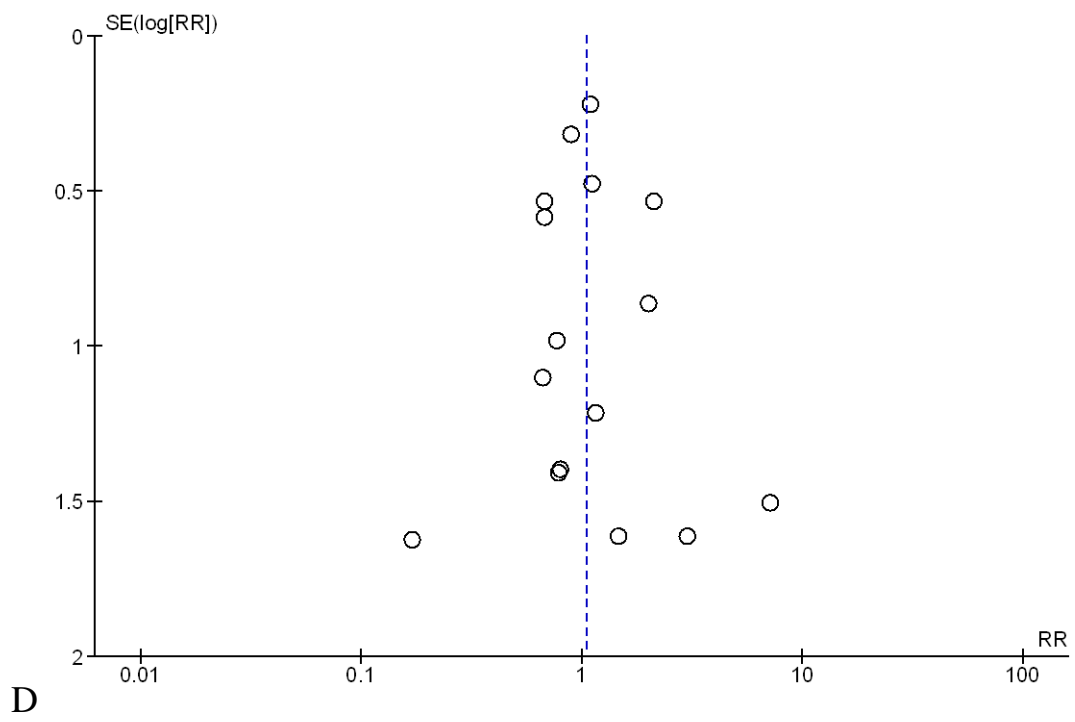

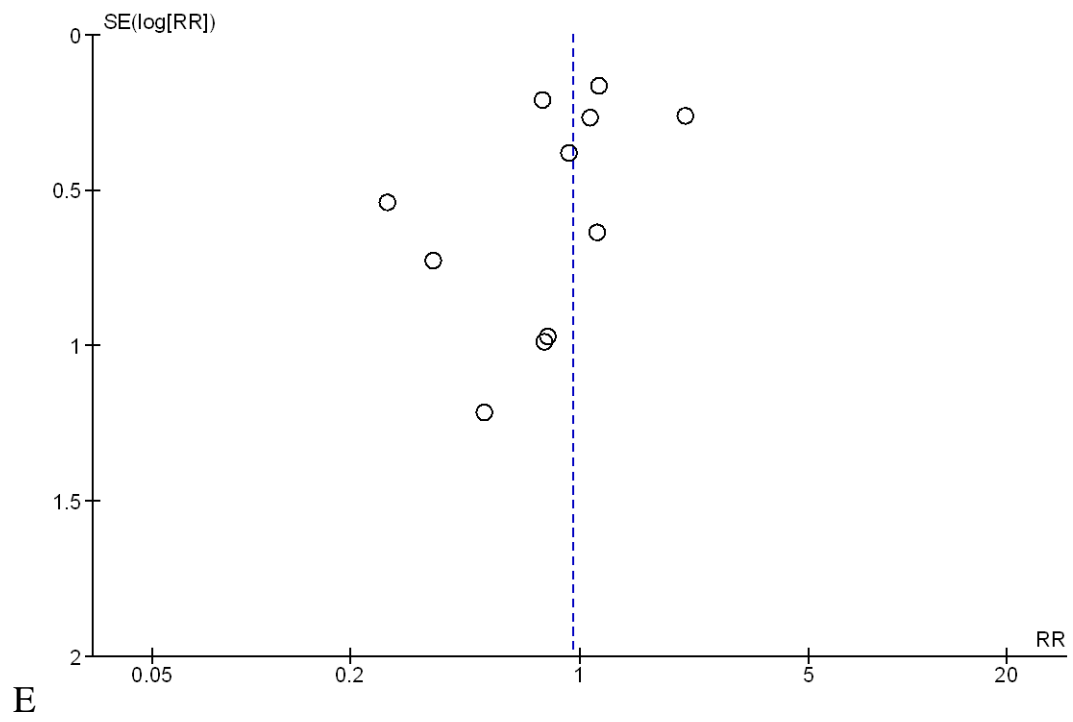

Supplement: inline-supplementary-material-10 [file inline-supplementary-material-10.pdf]
